# Supplementary material
Source: Springer Nature journal article supplement (https://www.springermedizin.de/resource/supplementary/12889_2011_3712_MOESM1_ESM.pdf/9489904)

..... Farmer.

\_\_\_\_\_ Worker

**Male**

**Female**

**A**

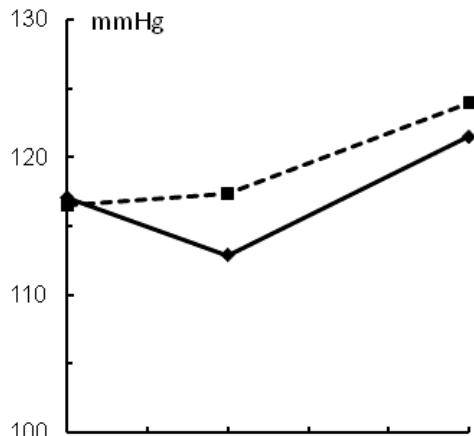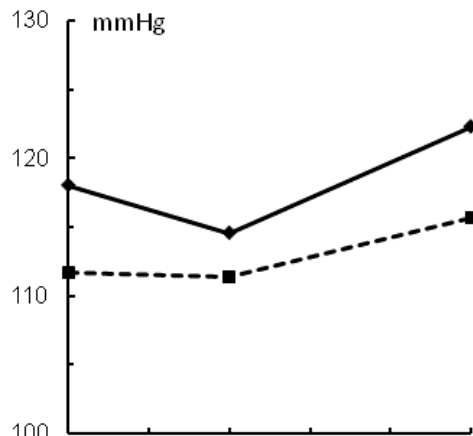

**B**

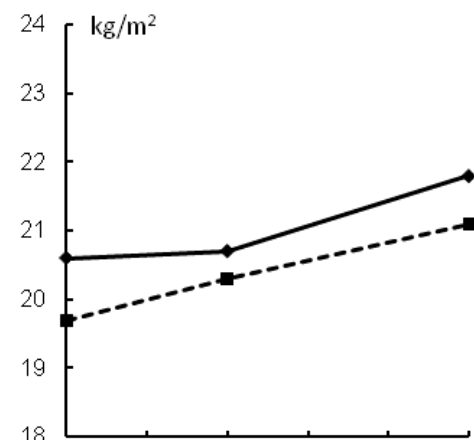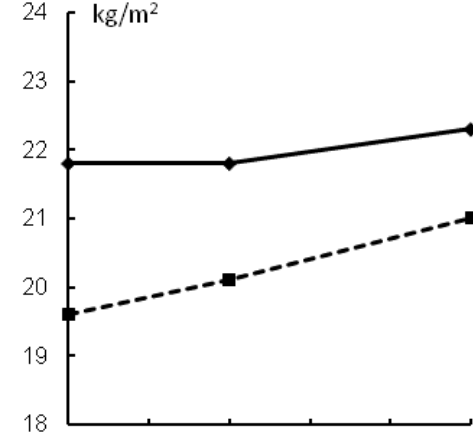

**C**

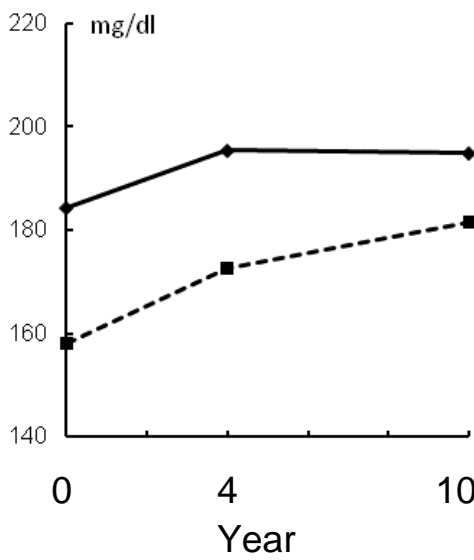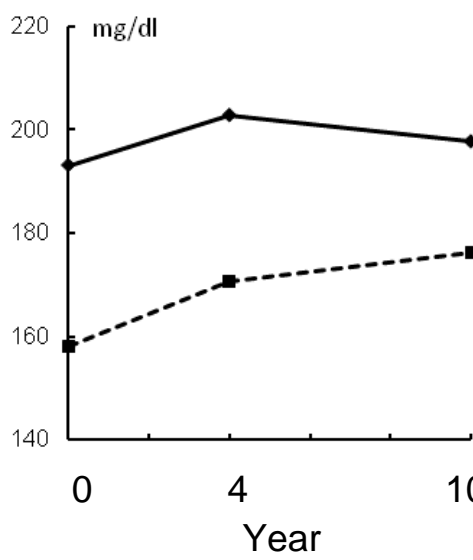

Supplement: MOESM1 [file 9489904]
